# Supplementary material
Source: MDPI journal article supplement (https://www.mdpi.com/2227-9709/10/3/55)
Supplement: s1 [file s1]

# Supplementary Information: Classification of Benign and Malignant Renal Tumors Based on CT Scans and Clinical Data Using Machine Learning Methods

Jie Xu <sup>1,\*</sup>, Xing He <sup>1</sup>, Wei Shao <sup>2</sup>, Jiang Bian <sup>1</sup> and Russell Terry <sup>3</sup>

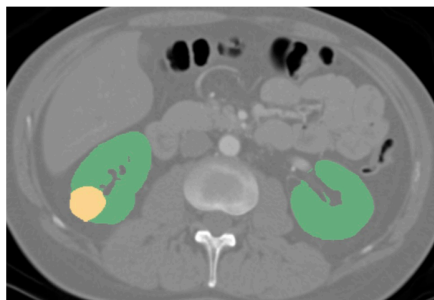

(a) Malignant tumor

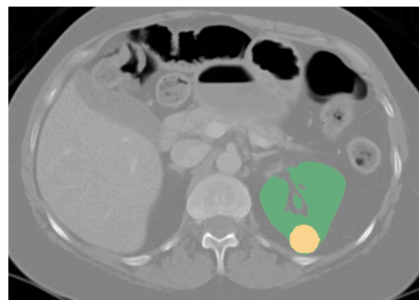

(a) Benign tumor

**Supplementary Figure S1.** Examples of CT scans: (a) malignant tumor; (b) benign tumor. Green Area: Renal, Yellow Area: Tumor.

**Supplementary Table S1.** P-values from the Mann-Whitney U test comparing AUCs of two models.

| Models    |         | Both  |          |       | Radiomics |          |      | Scans  | Clinical |          |
|-----------|---------|-------|----------|-------|-----------|----------|------|--------|----------|----------|
|           |         | RF    | XG Boost | MLP   | RF        | XG Boost | MLP  | 3D CNN | RF       | XG Boost |
| Clinical  | *MLP    | 0.002 | 0.043    | ***   | 0.001     | ***      | ***  | ***    | ***      | ***      |
|           | XGBoost | ***   | ***      | ***   | ***       | ***      | ***  | ***    | 0.019    |          |
|           | *RF     | ***   | ***      | ***   | ***       | 0.002    | ***  | ***    |          |          |
| Scans     | 3DCNN   | ***   | ***      | 0.872 | ***       | ***      | 0.78 |        |          |          |
| Radiomics | MLP     | ***   | ***      | 0.666 | ***       | ***      |      |        |          |          |
|           | XGBoost | ***   | ***      | ***   | ***       |          |      |        |          |          |
|           | RF      | 0.871 | 0.172    | ***   |           |          |      |        |          |          |
| *Both     | MLP     | ***   | ***      |       |           |          |      |        |          |          |
|           | XGBoost | 0.229 |          |       |           |          |      |        |          |          |

\*MLP: Multilayer perceptron; \*RF: Random Forest; \*Both: clinical and radiomic features  
 \* p-value < 0.001 (Mann-Whitney U test): \*\*\*
